# Supplementary material for: Inhibitory Actions of Anti-Müllerian Hormone (AMH) on Ovarian Primordial Follicle Assembly
Source: PLOS journal article supplement (doi:10.1371/journal.pone.0020087), 2011-05-27
Supplement: S2 (10.1371/journal.pone.0020087.s002) [file journal.pone.0020087.s002]

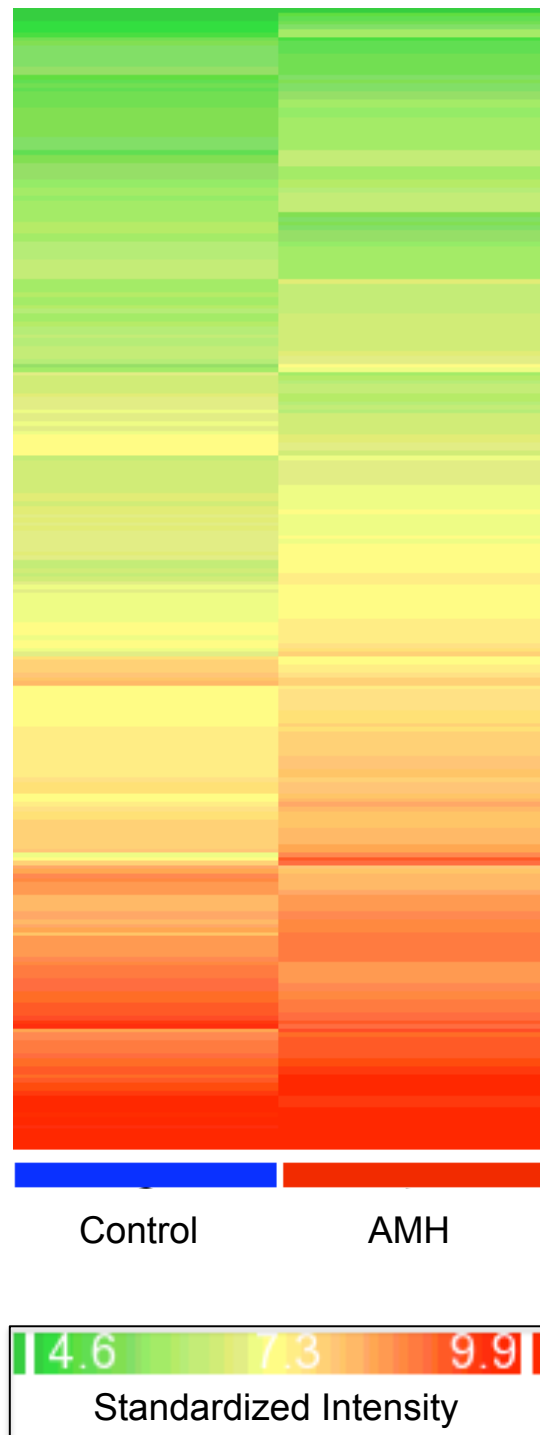

Supplemental Figure S2
