# Supplementary material for: Inhibitory Actions of Anti-Müllerian Hormone (AMH) on Ovarian Primordial Follicle Assembly
Source: PLOS journal article supplement (doi:10.1371/journal.pone.0020087), 2011-05-27
Supplement: S5 (10.1371/journal.pone.0020087.s005) [file journal.pone.0020087.s005]

**Supplemental Table S2.**

| <b>Gene Category</b>  | <b>Local Connectivity</b> |
|-----------------------|---------------------------|
| Cell proliferation    | 70                        |
| Cell differentiation  | 62                        |
| Apoptosis             | 57                        |
| Cell cycle            | 35                        |
| Cell survival         | 34                        |
| Cell death            | 33                        |
| Endocytosis           | 24                        |
| Cell migration        | 22                        |
| Morphogenesis         | 21                        |
| Angiogenesis          | 20                        |
| Wound healing         | 18                        |
| Neurite outgrowth     | 17                        |
| Cell contact          | 16                        |
| Cell fate             | 16                        |
| S phase               | 15                        |
| Mitosis               | 15                        |
| Embryonic development | 14                        |
| DNA recombination     | 13                        |
| Senescence            | 13                        |
| Cell cell contact     | 12                        |
| Pregnancy             | 12                        |
| Membrane polarization | 12                        |
| Meiosis               | 12                        |
| DNA degradation       | 11                        |
| Blood pressure        | 11                        |
| Neurogenesis          | 11                        |
| Exocytosis            | 10                        |
| Synaptic transmission | 10                        |

**Table S2.** Top cell processes for 274 differentially expressed genes in AMH-treated P0-ovary. Cell processes with highest local connectivity values (number of related literature references) were extracted from shortest connection sub-network obtained with Pathway Studio 7.0 software (Ariadne Genomics, Inc., Rockville, MD)
